# Supplementary material
Source: PubMed Central journal article supplement (PMC2799829)
Supplement: 0909331106_0909331106SI.pdf [file 0909331106_0909331106SI.pdf]

# Supporting Information

Lower et al. 10.1073/pnas.0909331106

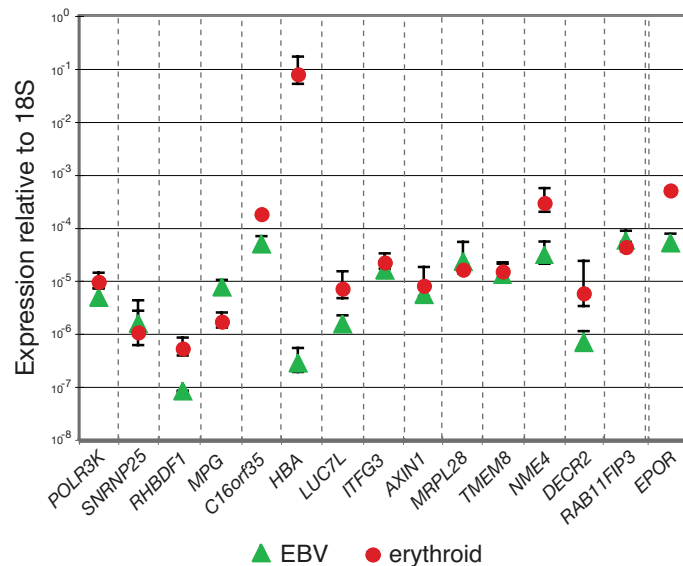

**Fig. S1.** Expression of genes contained within the terminal 500 kb of chromosome 16p, and an erythroid control gene *EPOR*, in EBV and erythroid cells. Expression was normalized to 18S. Values represent an average of three biological replicates  $\pm$  1 standard deviation. The y axis is a log scale. Although it appears that the expression of *LUC7L* increases in erythroid cells, comparison with hES cells (Fig. 1) suggests that expression actually decreases in EBV-transformed lymphocytes.



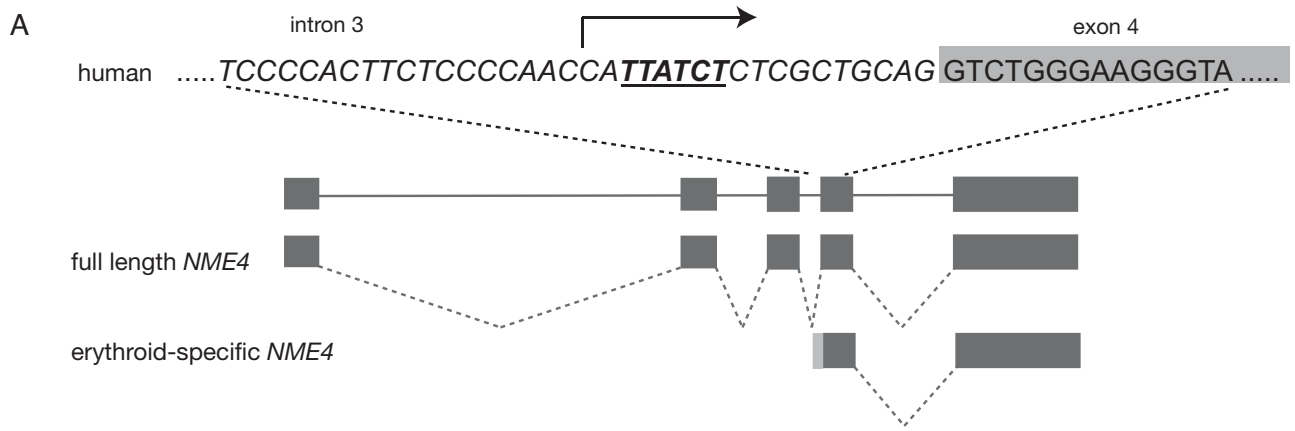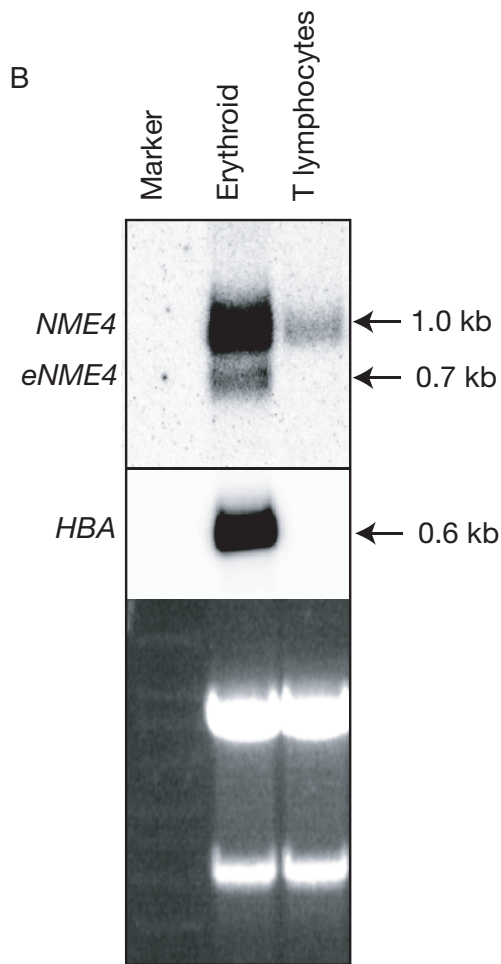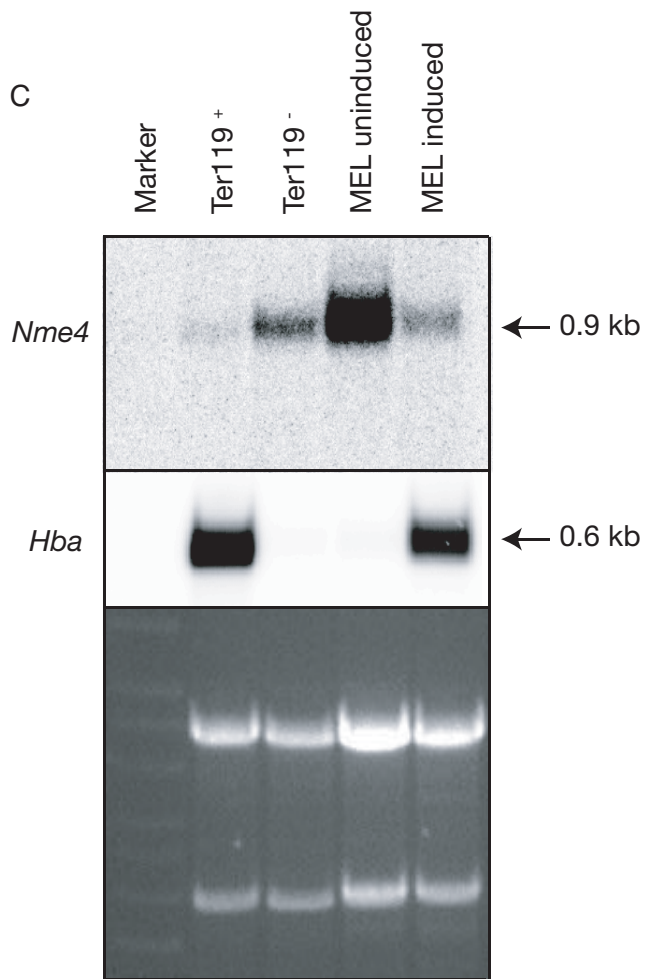

**Fig. S3.** Structure and expression of *NME4* and *eNME4* in erythroid and nonerythroid cells. (A) The GATA1 site contained within intron 3 of *NME4* is in bold and underlined. The arrow represents the start of transcription. (Boxes) exons; (continuous lines) introns; (dashed lines) splicing events. (B) Northern blot showing the up-regulation of *NME4* and the presence of *eNME4* compared to a nonerythroid control. (C) Northern blot showing *Nme4* expression in erythroid [Ter119<sup>+</sup> and MEL (mouse erythroleukemia) induced] and nonerythroid (Ter119<sup>-</sup>) and MEL uninduced i.e. movement of the end bracket murine tissues. The blots were stripped and reprobbed with corresponding  $\alpha$ -globin probes. Probe information can be found in Table S3. Ethidium bromide stained gels (before blotting) are shown as loading controls.

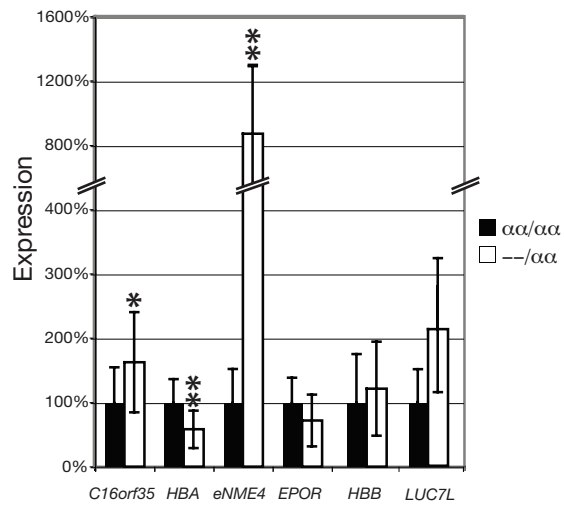

**Fig. S4.** Expression of *LUC7L* is not significantly different between controls and  $-/-\alpha\alpha$  samples. Data are as in Fig. 2A, with the addition of *LUC7L*. Student's *t* test  $P = 0.071$ .



**Table S1. ABI expression assay IDs for expression analysis**

| Gene symbol      | ABI assay-on-demand |
|------------------|---------------------|
| <i>EPOR</i>      | Hs00181092_m1       |
| <i>CD71</i>      | Hs00951094_m1       |
| <i>SNRNP25</i>   | Hs00430677_m1       |
| <i>RHBDF1</i>    | Hs00430530_m1       |
| <i>LUC7L</i>     | Hs00216077_m1       |
| <i>AXIN1</i>     | Hs00394718_m1       |
| <i>MRPL28</i>    | Hs00371771_m1       |
| <i>RAB11FIP3</i> | Hs00206755_m1       |

Table S2. Primer sequences for expression analysis

| Gene symbol     | Forward primer          | Reverse primer           | Probe                       | 5' Label | 3' Label |
|-----------------|-------------------------|--------------------------|-----------------------------|----------|----------|
| <i>POLR3K</i>   | CCCCTACGTGCACAACATCAC   | CATCATCCACTTCTTTCAGTTTGG | CCGCAAGGTAACAAA             | 6-FAM    | MGB-NFQ  |
| <i>MPG</i>      | GCATCTATTTCTCAAGCCCAAAG | GGAGTTCTGTGCCATTAGGAAGTC | AGTTCTTCGACCAGCCGGCAGTCC    | 6-FAM    | TAMRA    |
| <i>C16orf35</i> | CAACGCCCTCAGCTTTGG      | GCTGGTGAGGGTCATGTCATC    | CCCCAACCAGCAGC              | 6-FAM    | MGB-NFQ  |
| <i>HBA</i>      | GCCCTGGAGAGGATGTTCTT    | CGTGGCTCAGGTCGAAGTG      | CCTTCCCCACCACCAAGACCTACTTCC | 6-FAM    | TAMRA    |
| <i>ITFG3</i>    | GGCGGCCCGTTCAAG         | GAGCCCACAAGAAGCACATCT    | TCCCAGGGAACGCCGGTG          | 6-FAM    | TAMRA    |
| <i>TMEM8</i>    | GCTGCAGTACTGCGACTTCTTG  | TGAGCCGTGCCATGCA         | CGGCCATCTGGGTCA             | 6-FAM    | MGB-NFQ  |
| <i>NME4</i>     | CGTGATCCAGCGCTTTGAG     | TGGTAGTGCTCGGCAAGGA      | CTGCAGGCACCAGAGA            | 6-FAM    | TAMRA    |
| <i>DECR2</i>    | GTCCCGATTGCTGAGATTTTC   | TCCTACTGGCAATCACCGTATG   | ATGCGGCACGCT                | 6-FAM    | MGB-NFQ  |
| <i>HBB</i>      | GTGCATCTGACTCCTGAGGAGAA | CCTCTGGGTCCAAGGGTAGAC    | CACCAACTTCATCCACGTTCACT     | 6-FAM    | TAMRA    |
| <i>eNME4</i>    | TTATCTCTCGCTGCAGGTCTGG  | CCACGGAGTCGCTGGCGTGG     | CATGATGGACACACCGACTCGGCT    | 6-FAM    | TAMRA    |

**Table S3. Northern probes for expression analysis**

| Northern probes | Start position           | End position             |
|-----------------|--------------------------|--------------------------|
| <i>NME4</i>     | Chr16:390341             | Chr16:390554             |
| <i>Nme4</i>     | Chr17:26229074           | Chr17:26228829           |
| <i>HBA</i>      | Chr16:163136, 166940     | Chr16:163579, 167390     |
| <i>Hba</i>      | Chr11:32183936, 32196753 | Chr11:32184462, 32197279 |



**Table S4. Pyrosequencing primers**

|             | Forward primer           | Reverse primer         | Sequence primer | 5' Label | 3' Label |
|-------------|--------------------------|------------------------|-----------------|----------|----------|
| <i>NME4</i> | *GTCTGGGAAGGGTACAATGTCGT | TGCTGATGTGGACGCTGAAGTC | GTCCAATCATGGCCC | *Biotin  | —        |

Sequence to be analyzed (SNP shown in bold): Allele A (rev comp.) TTGAGGCGCG; Allele G (rev comp.) TCGAGGCGCG.  
Dispensation order: E(nzyme)-S(ubstrate) T - G-A-C-G-C-G-C-A-G. Asterisk represents the presence of 5' biotin on the forward primer.

**Table S5. Pyrosequencing dispensation order and contribution of each allele to the peak height**

| Peak     | Base     | Allele contribution to signal  |
|----------|----------|--------------------------------|
| 1        | T        | $2 \times A + 1 \times G$      |
| 2        | G        | $1 \times A$                   |
| 3        | A        | $1 \times A$                   |
| <b>4</b> | <b>C</b> | <b><math>1 \times G</math></b> |
| 5        | G        | $2 \times A + 1 \times G$      |
| 6        | C        | $1 \times A$                   |
| 7        | G        | $1 \times A$                   |
| <b>8</b> | <b>C</b> | <b><math>1 \times A</math></b> |
| 9        | A        | $1 \times G$                   |
| 10       | G        | $2 \times A + 2 \times G$      |

Calculation of allelic contribution: Proportion of G allele = peak 4 / (peak 4 + peak 8). Peaks used for calculations shown in bold.

**Table S6. Primer sequences for ChIP analysis and 4C amplification**

| Amplicon | Forward primer               | Reverse primer           | Probe                              | 5' Label | 3' Label |
|----------|------------------------------|--------------------------|------------------------------------|----------|----------|
| ChIP     |                              |                          |                                    |          |          |
| 103432   | CAGGCTCCAGGCCATATC           | CCTCTGCACTGTCTTTGAC      | TGCCAAGAGCTCCTTCTGCAACC            | 6-FAM    | TAMRA    |
| 107816   | CTAATTTCTGTGCTCCCGTTCT       | CCTTGAATGCTTCCCTTGA      | CATCCAGCCAGCTTCACAAGGACCA          | 6-FAM    | TAMRA    |
| 162909   | GGGCCGGCACTCTTCTG            | GGCCTTGACGTTGGTCTTGT     | CCCACAGACTCAGAGAGAACCCACCATG       | 6-FAM    | TAMRA    |
| 184955   | CCACGATGGCATAAGGATAATCT      | CATACTTTCCGTGCCCTTGTG    | CGTGCTCTCATCCACTGGGTATGG           | 6-FAM    | TAMRA    |
| 352333   | CGTCCAAGAACGCCTCTT           | GAGAAGCCTCGTCTCCAGACA    | TCCAGGGCGCACCAGCATTG               | 6-FAM    | TAMRA    |
| 381959   | ACCAGATAGGCAGTCCATGCTT       | GGCTGTACTGCCGCTCAGA      | ATGGCAGTGAGACCCAGACGCAGTTC         | 6-FAM    | TAMRA    |
| 386320   | GAACAGGCTTTTTCAAGACTCATTAA   | TGGGTAGATAGCACAGCATGCT   | AAGTTCTAGCAGTGGGAGACCTAACCATTTCAAA | 6-FAM    | TAMRA    |
| 387009   | CCGTGGGAAAGCGTTAAAC          | AACGCCAATTTCTGTAAAAATCAG | TCGGTGTAAGACGAATGCAATTCGAGAA       | 6-FAM    | TAMRA    |
| 388058   | CCTCCCGTGGGCTTCAG            | AGACCTGTATGTCCCACAGAATC  | TAACTTTTCTCCTGGCCTGGCGGA           | 6-FAM    | TAMRA    |
| 389776   | CCCCAACCATTAATCTCTCGCT       | CGGTGTGTCCAATCATGGC      | AGGGTACAATGTGTCCGCGCCTC            | 6-FAM    | TAMRA    |
| 391288   | TTGTAAGGAGTTGAACAGTAAAGAGGAA | ACCCCTGCCTGGCTCATAC      | TGCACACCCAGTTCCATAACGTTGTTG        | 6-FAM    | TAMRA    |
| 396875   | GCCCCTGCCCCACT               | TCCTACTGGCAATCACCGTATG   | TGCTTCTGGTTTTGCAGGCACGG            | 6-FAM    | TAMRA    |
| 4C       |                              |                          |                                    |          |          |
| MCS-R2   | CTGCTGATTACAACCTCTGGTGC      | GAGCCTGGGGGAAAGGAGTAG    |                                    |          |          |
